# Supplementary material
Source: PubMed Central journal article supplement (PMC4004965)
Supplement: NIHMS552100-supplement-2.pdf [file NIHMS552100-supplement-2.pdf]

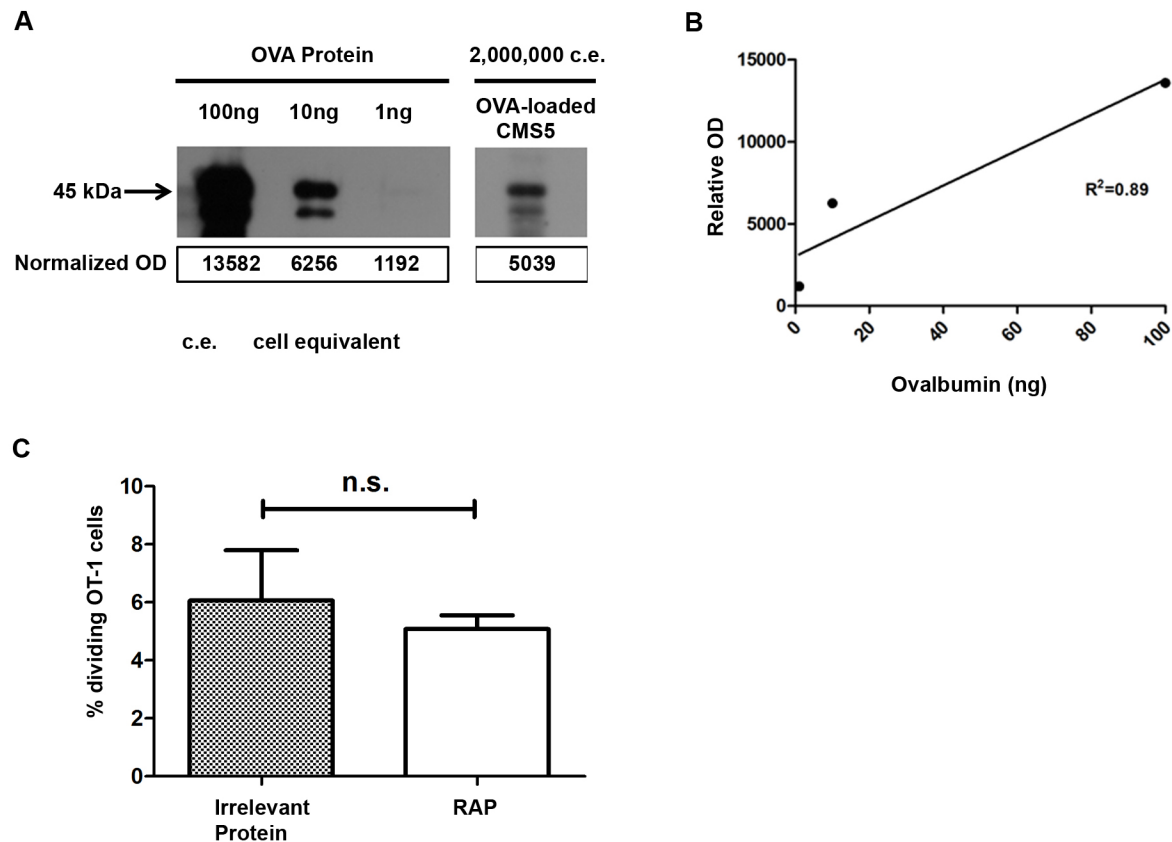

**Figure S2. The effect of RAP on T cell proliferation *in vivo*.** (A) Titrated amount of ovalbumin protein and  $2 \times 10^6$  cell equivalent (c.e.) of lysate from OVA-loaded CMS5 were analyzed by SDS-PAGE and immunoblotted with anti-OVA antibody. The immunoblots were scanned and quantified, and the relative optical density (OD) units are indicated below the blots. (B) A linear relationship was established between the titrated amounts of ovalbumin protein and their relative OD. It was established that  $1 \times 10^5$  cell immunizing dose contained approximately 1 ng of OVA. (C) CFSE-labeled CD45.2<sup>+</sup> OT-1 cells were adoptively transferred into CD45.1<sup>+</sup> C57BL/6 mice, one day before immunization with high dose ( $1 \times 10^6$  cells) of mitomycin-C treated OVA-loaded CMS5 with or without RAP expression. Three days post immunization, the draining inguinal and axillary lymph nodes were harvested and stained for CD45.2 and CD8 expression to differentiate adoptively transferred OT-1 cells from endogenous responses. The percentages of dividing OT-1 cells were compared in mice immunized with OVA-loaded CMS5 cells, expressing RAP or control protein. n.s. not significant. Experiments were performed with 3-4 mice per group. Error bars indicated s.e.m.
